# 1 A survey of mapping algorithms in the long-reads 2 era

3 **Kristoffer Sahlin** 

4 Department of Mathematics, Science for Life Laboratory, Stockholm University, 106 91, Stockholm,  
5 Sweden.

6 **Thomas Baudeau**

7 Univ. Lille, CNRS, Centrale Lille, UMR 9189 CRIStAL, F-59000 Lille, France

8 **Bastien Cazaux**

9 Univ. Lille, CNRS, Centrale Lille, UMR 9189 CRIStAL, F-59000 Lille, France

10 **Camille Marchet**<sup>1</sup>  

11 Univ. Lille, CNRS, Centrale Lille, UMR 9189 CRIStAL, F-59000 Lille, France

## 12 — Abstract —

---

13 It has been ten years since the first publication of a method dedicated entirely to mapping third-  
14 generation sequencing long-reads. The unprecedented characteristics of this new type of sequencing  
15 data created a shift, and methods moved on from the *seed-and-extend* framework previously used for  
16 short reads to a *seed-and-chain* framework due to the abundance of seeds in each read. As a result,  
17 the main novelties in proposed long-read mapping algorithms are typically based on alternative seed  
18 constructs or chaining formulations. Dozens of tools now exist, whose heuristics have considerably  
19 evolved with time. The rapid progress of the field, synchronized with the frequent improvements of  
20 data, does not make the literature and implementations easy to keep up with. Therefore, in this  
21 survey article, we provide an overview of existing mapping methods for long reads with insights into  
22 algorithmic details.

23 **2012 ACM Subject Classification** Computational genomics

24 **Keywords and phrases** Mapping, alignment, minimizers, syncmers, dynamic programming, seed-  
25 and-chain, long reads, third generation sequencing

26 **Funding** This work was funded by ANR INSSANE ANR21-CE45-0034-02 project.

27 **Acknowledgements** The authors would like to thank Mikaël Salson and Laurent Noé for proofreading  
28 the manuscript and suggesting revisions.

## 29 **1** Introduction

30 With the introduction of PacBio long-read sequencing and later Oxford Nanopore Technologies  
31 emerged a need for mapping long and noisy sequencing reads. The data proposed new  
32 computational challenges of mapping millions of sequences, initially at expected error rates  
33 of 10-20%. From the start, authors noticed that the seed-and-extend paradigm used in short-  
34 read mapping was not practical for long-reads. First, seed-and-extend would usually rely on  
35 a single match before extending, while long-reads required multiple consistent matches along  
36 the read to be confidently mapped. Second, the extending part, which relies on alignment  
37 algorithms with quadratic time complexity, had to be avoided given the combined length and  
38 the frequent insertions and deletions in such data. Early on, the computational problem was  
39 compared to whole-genome alignment, with the additional complexity of high error rates.  
40 Such observations lead to the novel *seed-and-chain* paradigm for mapping long-reads (see  
41 Figure 1). However, the first long-read alignment algorithms using older seeding techniques

---

<sup>1</sup> corresponding author

## 2 A survey of long-read mapping

42 designed for generic sequence alignment (e.g., BLAST) were not time-competitive in their  
43 throughput compared to short-read mappers. Thus, sketching and subsampling techniques  
44 imported from comparative genomics started to appear in this domain.

45 Recently, specific sub-problems in the mapping domain have been identified and investig-  
46 ated, such as partial and gapped alignment of reads for structural variant discovery, aligning  
47 reads in repetitive regions or from non-reference alleles to correct loci, and other applications  
48 such as spliced-mapping of RNA reads. These specific problems require and motivate novel  
49 algorithmic solutions. In this survey article, we give an overview of the techniques that have  
50 been proposed over the last decade for mapping long reads to genomes.

## 51 **2** Definitions and state-of-the-art of tools

### 52 2.1 Preliminaries

53 In this article we restrain ourselves to the problem of mapping a sequence shorter or equal  
54 to a genome (a read) to a reference genome. We further assume that the reads come from a  
55 genome that is closely related to the reference genome, such as from the same organism or a  
56 closely related species.

57 Let  $q = (q_1, \dots, q_l)$  be the read sequence of size  $l$  and  $t = (t_1, \dots, t_n)$  the sequence of the  
58 reference region of size  $n$ . Let  $\Sigma = \{A, C, G, T\}$  and  $\Sigma_+ = \{A, C, G, T, -\}$  be two alphabets,  
59  $x$  and  $y$  strings are defined on  $\Sigma$ . Let  $f : \Sigma_+^* \rightarrow \Sigma^*$  be a transform that maps a string to its  
60 subsequence with all "-" characters removed. An alignment is a pair of strings  $(q', t') \in \Sigma_+^2$   
61 such that:

- 62 1.  $|q'| = |t'| = S$
- 63 2.  $f(q') = q$  and  $f(t') = t$
- 64 3.  $(q'[i], t'[i]) \neq (-, -)$ , for  $0 \leq i < S$

65 Many alignments exist for a given pair of strings, in theory, the methods described  
66 hereafter aim at finding *good* alignments, i.e. alignments that optimize some distance  
67 between the pair of strings. The distance is computed using score functions which give rules  
68 on the characters pairing.

69 With *read mapping*, we mean the procedure to find a read's location on the reference  
70 genome. Typically, long-read mapping is performed by seeding and chaining the seeds into  
71 high-scoring regions on the genome. In this study, a *read alignment* implies both that the  
72 read has been mapped to a location, and that a pairwise alignment between the read and the  
73 genome at the mapped location has been performed. Algorithms exist to compute optimal  
74 semi-global pairwise alignments with respect to a score function. However, their complexity  
75 in  $\mathcal{O}(n \times l)$ , disqualifies them in the context of handling big data such as sequencing data.  
76 Therefore, methods of the literature use heuristics to perform read mapping on a reference.  
77 They do not guarantee to find the optimal solution.

78 In our survey, we discuss read mapping to a genome sequence. We will use the terms  
79 *query* for a read and *reference* to denote the genome.

### 80 2.2 Overview of fundamental ideas

81 To our knowledge, the first mapper explicitly written for long-reads was BLASR [12], although  
82 short-reads mappers had been adapted for the long-read usage [37, 41, 47]. While solutions  
83 specialized for either Nanopore [5] or PacBio [28] characteristics appeared, most modern  
84 mappers work for both technologies with adapted parameters. BLASR presented itself as an

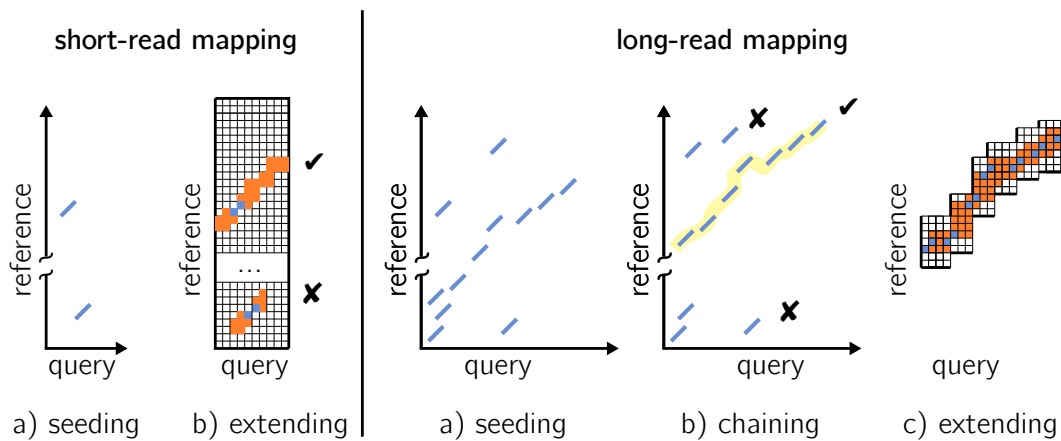

**Figure 1** Differences in the main steps between short-read mapping (left) and long-read mapping (right). *Query* denotes the read and *reference* denotes a genome region. Mainly, short-read approaches extend (orange parts) from a single anchor (in blue) on the whole read length while long-read approaches gather multiple anchors, and chain (yellow line) them in for a candidate extending procedure that is done between pairs of anchors.

85 approach descending from both genome to genome alignment methods (such as MUMmer [16])  
86 and short-read mappers. The paper contains seminal ideas used in modern long-read mappers  
87 such as the seed-and-chain paradigm.

88 **Seeding** Seeding is the first operation in the heuristics used by mapping techniques.

89 ► **Definition 1.** A *seed* is a subsequence extracted from the query or the reference.

90 The purpose of seeding is to find relatively small matching segments between the query  
91 and the reference that serves as markers for reference regions that potentially are similar to  
92 the read. The reason seeding is used is that it is typically computationally efficient to find  
93 matching seeds that can narrow down regions of interest compared to, *e.g.*, global alignment  
94 of the read to the reference. As we will see in Section 3.1, seeds can be of different nature.  
95 Seeding relates to pattern matching, although in sequence bioinformatics, practically all  
96 approaches work under the paradigm which indexes the reference and query the index to find  
97 matches. The underlying assumption is that once the index is created, it can be used several  
98 times to map different query sets. To save space, reference indexes can be in a compressed  
99 form. Once matches are found, a second operation aims at finding sets of concordantly  
100 ordered seeds between the query and the reference (*chaining*; section 3.3 and to "fill the gaps"  
101 between seeds as well as providing the final nucleotide level alignment (*extension*; section 4).  
102 Seeding was quickly identified as a critical phase in long-read mapping, which led to novel  
103 proposals [49, 42, 71].

104 **Sketching and subsampling** An important idea for seeding is *sketching* that was introduced  
105 in MHAP, a long-read overlap finder implemented in an assembly algorithm [7]. Although long  
106 read mappers had already been proven faster than alignment approaches [71], the rationale  
107 was to improve the time efficiency of the long-read mapping problem in comparison to the  
108 throughput of the second generation sequencing mappers. Sketching consists of compressing  
109 the information of a set (here a set of  $k$ -mers) into a fixed-length vector (a sketch) of  
110 representative elements called fingerprints. By comparing two sketches, one can approximate

## 4 A survey of long-read mapping

111 a similarity estimation of the two sets quickly and independently of their initial set sizes.  
112 Several approaches exist [9, 54, 14]. MHAP relied on sketching with a MinHash approach.  
113 MinHash [9] is a sketching technique based on locally sensitive hashing, which produces an  
114 unbiased estimator for the Jaccard distance between two sets by selecting a subsample for  
115 each set and comparing them in a very efficient way. Thus, MHAP overcame a space limitation  
116 of BLASR which would index the whole reference. The type of matches (exact, fixed-size)  
117 induced by MHAP's approach also allowed to perform rapid queries. An important limitation  
118 of MHAP was that the sampling technique gave no guarantee to uniformly cover the query's  
119 sequence. This led to the development of subsampling techniques which have been adapted  
120 to approximate distances between sequences, starting with `minimap` [42]. Seeding is still an  
121 active research area of long-read mapping with several recent developments [35, 70, 22, 60].  
122 Sketching and subsampling are discussed in Section 3.1.2.

123 **Chaining** A key intuition is that in short-reads mapping, the extending procedure could  
124 start after finding a single shared seed between the query and the reference, called anchors  
125 (for details on techniques related to the previous sequencing generation, we refer the reader  
126 to a methodological survey of short-read mapping [3]).

127 ► **Definition 2.** An *anchor* is a matching seed between the query and the reference. It is  
128 represented by a pair of coordinates on the query and the reference.

129 In long-read mapping, the length of the reads and the short seed length used due to the  
130 initial high long-read error rates can lead to a large number of seed matches. It is therefore  
131 necessary to reduce the search space by selecting subsequences of ordered anchors (chains).

132 ► **Definition 3.** Let  $\mathcal{A} = [a_0, a_1, \dots, a_k]$  be an list of anchors defined by their coordinates  
133 on the reference and the query. A *chain* is a subsequence of  $\mathcal{A}$  of length  $c \leq k$ . A *colinear*  
134 *chain* is a subsequence of  $\mathcal{A}$  in which anchors are sorted by such that if  $i < j$ ,  $a_j$  is above  
135 and to the right of  $a_i$  in the (reference, query) plane.

136 Drawing inspiration from genome-wide mapping, BLASR introduced a chaining step which  
137 aims at selecting high-scoring chains from a set of candidate chains. Chaining allows to reduce  
138 the final step of a long-read aligner (the base level extension) to alignment of sub-regions  
139 between ordered anchors in chains. Chaining in long-reads has been solved using various  
140 dynamic programming procedures [71, 61, 43]. In particular, the continuous work effort put  
141 in `minimap2` [42, 43, 44] in both seeding and chaining processes made it a baseline for many  
142 other tools' development.

143 While this survey covers the genomic mapping aspects, other important contributions  
144 have dealt with adapted procedures in the case of long-read RNA mapping [53, 65, 50, 74],  
145 and structural variant identification [68, 48, 24, 73], or other specialized problems [55]. Other  
146 related research focused on read-to-read overlap detection [20, 75]<sup>2</sup>, or alignment-free/pseudo-  
147 mapping approaches [33, 13]. Finally, here we describe algorithmic solutions working on the  
148 nucleotide sequence, but raw signal mappers for Nanopore long-reads is also an active area  
149 of research [29, 76, 38].

---

<sup>2</sup> and the unpublished DALIGNER <https://github.com/thegenemyers/DALIGNER>

## 150 **3 A survey of algorithmic steps**

### 151 **3.1 Seeding almost always uses sampled, exact, fixed-length matches**

152 Seeding is the procedure that consists in collecting a set  $\mathcal{S}$  of seeds from the reference, then  
153 finding matches between the query's seeds and  $\mathcal{S}$ . In order to find matches efficiently,  $\mathcal{S}$  is  
154 stored using an index data-structure. In the following we detail the different types of seeds  
155 that can be encountered and Figure 2 illustrates some of the approaches that have been  
156 proposed.

#### 157 **3.1.1 $k$ -mers**

158 Substrings of length  $k$ , or  $k$ -mers, are perhaps the most commonly used seed in bioinformatics.  
159 Such seeds can be extracted from the reference and stored for queries with little computational  
160 cost. This makes  $k$ -mers popular in mapping and alignment applications that require high-  
161 performance to scale for millions to billions of reads. A  $k$ -mer seed can be indexed by using  
162 a hash function to produce an integer value (usually as a 32 or 64-bit integer), which is then  
163 added to a hash table. This makes indexing of  $k$ -mers computationally cheap, provided that  
164 the hash function and hash table implementations are efficient. Methods to efficiently hash  
165  $k$ -mers have been proposed [56], which uses the previous  $k$ -mers hash value to compute the  
166 next one using a rolling hash function.

167 Both a strength and a weakness with  $k$ -mers are that if a  $k$ -mer match is found, it is  
168 guaranteed to be exact. While it is desirable to produce matches only to identical regions, a  
169 downside is that mutations will "destroy" the  $k$ -mers in the region. This has been studied  
170 theoretically in [6] where the authors derived analytical expressions for the mean and variance  
171 of regions without matches for a given mutation rate.

#### 172 **3.1.2 $k$ -mer subsampling techniques**

173 As any two consecutive  $k$ -mers share most of their sequence and are therefore mostly  
174 redundant, we could reduce the memory overhead and query time without losing much of  
175 the information if not all adjacent or nearby  $k$ -mers were stored. In the following, we present  
176 different methods that allow picking a subsample of representative  $k$ -mers as seeds. These  
177 approaches have proven their efficiency at reducing drastically the number of objects to index  
178 while keeping high sensitivity and specificity for matches.

179 **No distance guarantee between seeds: sketching** Sketching gives typically no guarantee  
180 of distance between two  $k$ -mer representatives, which means that a very large gap can appear  
181 between two consecutive selected  $k$ -mers. An early work [7] bases its long-read mapping  
182 strategy on MinHash sketching by using a total ordering on the  $k$ -mers' hashes (see (a) in  
183 Figure 2), and keeping minimal hashes in the ordering (representing their  $k$ -mers). Related to  
184 read mapping, it was used to perform genome-length sequences alignment-free mapping [33]  
185 and to find read-to-read overlaps in long-read assembly [69]. However, fixed-size sketches do  
186 not adapt well to different read lengths since the number of fingerprints remains constant for  
187 any distinct  $k$ -mer number. Because of this, two similar regions from sequences of different  
188 sizes will not automatically have the same representative, which is a desired property for  
189 seeding. Therefore this approach was later replaced by other subsampling strategies in  
190 following papers.

## 6 A survey of long-read mapping

191 **Distance guaranteed between seeds** On the contrary, subsampling techniques have been  
192 proposed to guarantee that for a certain amount of consecutive  $k$ -mers, at least one will  
193 be selected. The first  $k$ -mer subsampling technique proposed in the context of long-read  
194 mapping was *minimizers* [62]. In our framework, minimizers are sampled  $k$ -mers given  
195 two parameters  $m$  and  $w$ . Given the set  $k$ -mers starting in a window  $[m, m + w - 1]$  of  $w$   
196 positions on the sequence, a minimizer is the minimal value over this set (and therefore the  
197  $k$ -mer associated with this minimal value) (see (b) in Figure 2). Minimizers are produced by  
198 extracting a minimizer in each window  $w \in [0, |S| - w + 1]$  over a sequence  $S$ . The techniques  
199 used for assigning values to  $k$ -mers are discussed in section 3.2.1. Minimizers are agnostic  
200 to their relative abundance over a sequence. Different optimizations have been proposed  
201 to reduce the density of sampled minimizers in some regions. Weighted minimizers [35]  
202 implement a procedure to select  $k$ -mers of variable rareness. In order for  $k$ -mers from  
203 highly repetitive regions not to be as likely as others to be selected, it first counts  $k$ -mers,  
204 and downweights frequently occurring ones. Then it takes this weight into account for the  
205 hashing procedure. Other subsampling techniques include syncmers [18] and minimally  
206 overlapping words (MOW) [23]. The first was used in the context of long-read mapping [70]  
207 in an alternative implementation of `minimap2` and even more recently in [60]<sup>3</sup>. For their  
208 construction, syncmers use  $s$ -mers of size  $k - s + 1$  ( $s < k$ ) occurring within  $k$ -mers (see (c)  
209 in Figure 2, and Supplementary Figure S1 for an illustrated difference with the minimizers).  
210 The  $k$ -mer is selected if its smallest (in the sense of an ordering, typically on hashes)  $s$ -mer  
211 meets some criteria. An example criteria is that the  $s$ -mer appear at position  $p$  within the  
212  $k$ -mer ( $1 \leq p < k - s + 1$ ). By construction, syncmers tend to produce a more even spacing  
213 between sampled seeds while still allowing a distance guarantee.

214 **Context dependency of subsampling techniques** Minimizers are generated through a *win-*  
215 *nowing* procedure which compares all  $k$ -mers of a given window. The choice of representative  
216  $k$ -mer in a given window depends on the window's  $k$ -mer content. This property has been  
217 called *context dependency* [70]. On the contrary, syncmers can be described as context-free  
218 since each  $k$ -mer's capacity to be selected is independent. Being context-free implies better  
219 conservation of the overall sampled region under mutations. Indeed, context-dependent  
220 representatives can tend to be broken over several consecutive windows because of the  $k$ -mers  
221 propagating an error. Finally, other aspects can be considered, such as the related density [70]  
222 (informally, the expected number of selected  $k$ -mer over the total number of  $k$ -mers), or the  
223 deviation of minimizer-based strategies from the initial unbiased Jaccard estimator [6].

### 224 3.1.3 Fuzzy seeds handling substitutions

225 Due to read errors and SNPs between the reference and sequenced organism, it is in many  
226 scenarios desired that a seed match between the query and the reference even if the seed  
227 contains a substitution. Put differently, we would want similar  $k$ -mers to hash to identical  
228 hash values. A hash function that would produce identical hash values for similar but not  
229 necessarily identical inputs is usually referred to as a locality-sensitive hash function. We  
230 will refer to seeds produced under such methods as fuzzy or inexact seeds.

231 Several methods to produce inexact seeds have been described. Perhaps the most common  
232 one is spaced-seeds. Within a spaced-seed, some positions are required to match (called

---

<sup>3</sup> <https://github.com/bluenote-1577/os-minimap2> and [https://github.com/Shamir-Lab/syncmer\\_mapping](https://github.com/Shamir-Lab/syncmer_mapping)

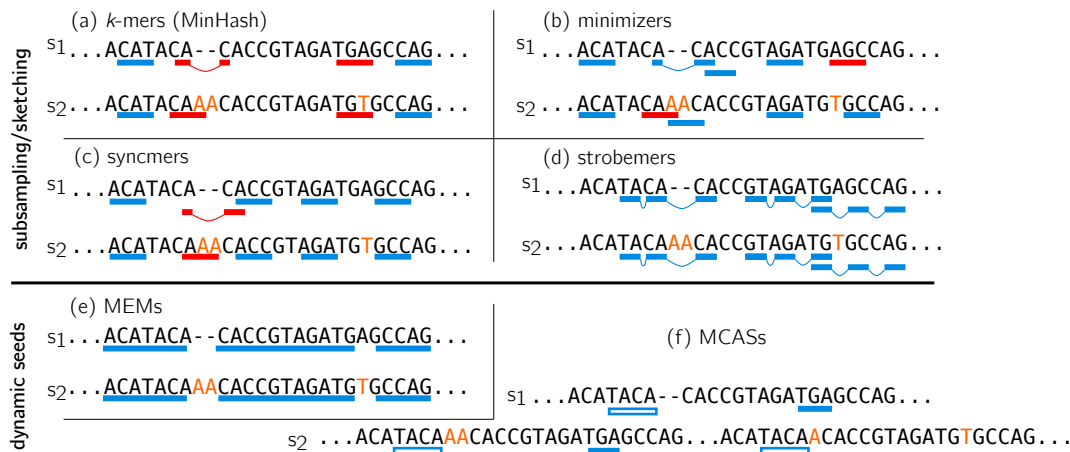

**Figure 2** Overview of major seeding techniques used in long-read mapping. The figure presents informally which bases will be selected (underlined) given the technique. For the sake of simplicity, we are not consistent with a hash pattern (for instance lexicographical order) when selecting the seeds in the different panels. A more comprehensive example following a pattern is presented in Supplementary Figure S1.

We use two related sequences  $s_1$  and  $s_2$  which differ from a (A/T) substitution and a AA insertion in  $s_2$  (in orange) to show the possible differences in selected bases (underlined in blue or red) due to mutations/errors. (a)  $k$ -mer seeds of length 3 selected with MinHash.  $k$ -mers have no distance guarantee and are picked based on having minimal hash value in total ordering of the hashes. (b) Minimizers picked with  $k = 3$  a window size of  $w$ . Minimizers has a maximum distance guarantee given by  $w$  but has no minimal distance guarantee and may therefore subsample densely in some regions. (c) A subset of strobemers consisting of three *strobes* (short  $k$ -mers) are illustrated. The first strobe is picked at the seed start position and the remaining strobes are selected in windows downstream from the start strobe. (d) Syncmers selected with  $k = 3$ ,  $s$  and the condition for selection are not detailed. Syncmers are context-free and respect a distance guarantee which tends to create pairs of evenly spaced seeds. (e) MEMs computed as exact matches until reaching a position that breaks the exactness. (f) MCAS.  $s_1$  remain the same than in other panels,  $s_2$  now contains two copies of a repeat, each has accumulated different mutations. A blue bordered region gives an example of a substring which is not a MCAS: it is repeated in the two copies. The blue-filled underlined region is a MCAS.

233 fixed positions) while the remaining positions can be ignored (called wildcards or don't care  
 234 positions). Within a  $k$ -mer, fixed positions can be selected to be wildcards by applying  
 235 particular masks on the  $k$ -mer's bases [32]. A problem with spaced-seeds is to find a fixed-  
 236 position profile to minimize the overlap of the fixed positions in the seeds [31]. Although the  
 237 computation of good spaced-seeds has been optimized [32], constructing good spaced-seeds  
 238 profiles requires extra computational work compared to  $k$ -mers and is therefore slower to  
 239 compute, and in practice, multiple different seeds are used [46] to increase sensitivity, which  
 240 requires storing multiple hash tables. Another limitation with fuzzy seeds for substitutions  
 241 is that seeds will, just as for  $k$ -mers, not match over indels.

242 While fuzzy-seeds handling substitutions have been used e.g. in metagenome short-read  
 243 classification [10] and permutation-based seeds were implemented for short-read mapping [40],  
 244 few of long-read mapping algorithms implement them. As indels are a frequent source of  
 245 variability on long-reads, the computations to construct these seeds may not be worth the  
 246 trade-off in increased sensitivity. An exception to this is a recent seeding mechanism [22],  
 247 where the authors use a variant of SimHash [14](an alternative locality sensitive hashing to

## 8 A survey of long-read mapping

248 MinHash) to construct fuzzy seeds over subsampled  $k$ -mers using the minimizer technique [62].  
249 The authors showed read alignment can be improved both in terms of speed and accuracy by  
250 integrating their seeds into `minimap2` [43].

### 251 3.1.4 Fuzzy seeds handling indels

252 A common source of errors and biological variation is short insertions and deletions. Neither  
253 the exact seeds nor the fuzzy seeds discussed so far are designed to match over such variability.  
254 Traditionally, matching over indels has typically been solved not by a single query of a fuzzy  
255 seed, but instead involved queries of a few short  $k$ -mers at a close occurring distance which are  
256 then inferred as a matching region. While several queries in a nearby region usually provide  
257 gold standard sequence similarity queries [4, 36], it comes at a significant computational cost.  
258 Along the same vein [71] proposed to index one so-called spaced  $k$ -mer as a seed in each  
259 position of the reference and would, query three different seeds for each position in the query  
260 (representing a mismatch, a deletion of length one, and a mismatch and a one nucleotide  
261 insertion). This design was motivated by overcoming the frequent substitutions and short  
262 indels present in third-generation sequencing techniques, but would only handle indels of  
263 one nucleotide (we provide details on this scheme in Supplementary Figures S2 and S3).  
264 Earlier, there have been works to handle higher error rates with so-called covering template  
265 families [26] that can guarantee a match up to any error rate  $e$ . Naturally, with higher  $e$ ,  
266 more seeds need to be indexed and queried and it becomes computationally prohibitive to  
267 use such seeding.

268 To remove the overhead of post-processing of nearby seeds [4, 36] or multiple queries [71]  
269 per indexed reference seed, one can instead link the  $k$ -mers up into a seed before storing  
270 it in the index. Such indexing has been favorable in the long-reads era where indels are  
271 frequent. One proposed method is to join two nearby minimizers into a seed. Joining nearby  
272 minimizers is usually a relatively cheap computation as the minimizers constitute a subset of  
273 the positions on the reference. Such a seeding technique has been used for long-read overlap  
274 detection for both genome assembly [15] and error correction [66]. While such indexing is  
275 relatively fast and matches regions over indels, the joining of nearby minimizers implies that  
276 if some minimizer(s) are destroyed due to mutations in a region, all of the seeds in that  
277 region will be destroyed. Put another way, nearby seeds share the same information (in the  
278 form of a shared minimizer). Therefore, alternative approaches such as strobemers [63] (see  
279 (d) in Figure 2) have been described, where the goal has been to reduce the information  
280 between closeby seeds by linking  $k$ -mers at seemingly random positions within a window.  
281 Such pseudorandom linking implies that if one seed is destroyed due to a mutation, a nearby  
282 seed may still match. Strobemers have shown effective at finding matches between long-reads  
283 and for long-read mapping [63], and have been used in short-read alignment programs [64]  
284 but they come at an increased computational cost to joining neighboring minimizers.

285 Another way to alleviate the issue that mutations will destroy consecutive seeds in the  
286 neighboring minimizers technique is to apply the SimHash technique on strobemers instead  
287 of  $k$ -mers [22]. Such seeds were used for long-read overlap detection [22] and the authors  
288 show that for the highest quality long-reads (PacBio HiFi), such seeds can speed up long-read  
289 overlap detection by an order of magnitude or more while retaining the same downstream  
290 level assembly accuracy.



### 291 3.1.5 Dynamic seeds

292 Previously discussed seeds share the characteristic that they can all be produced and inserted  
293 in a hash table, and consequently, only require a single lookup. This is typically fast and,  
294 hence, popular to use in long-read alignment algorithms. The downside is that if a seed is  
295 different in a region between the reference and the query (e.g., due to an error), there is no  
296 way to alternate the seeds in this region at alignment time. There are however other types  
297 of constructs, that we here refer to as dynamic seeds, that can be computed on the fly at the  
298 mapping step, and then used as seeds downstream in the read alignment algorithm.

299 **Maximal Exact Matches** Maximal exact matches (MEMs) [16] are matches between a  
300 query and reference sequence that cannot be extended in any direction on the query or  
301 reference without destroying the match (see (e) in Figure 2). These are typically produced  
302 by first identifying a  $k$ -mer match, and then an extension process is applied. MEMs are  
303 guaranteed to be an exact match between the query and the reference and are bounded below  
304 by length  $k$  but do not have an upper threshold for seed size. As there can typically exist  
305 many MEMs, a subset of MEMs that has a unique location on both the query and reference  
306 is sometimes considered. MEMs or similar approaches have been used in one of the earlier  
307 long-read alignment programs (e.g., BWA-MEM) [41, 12] and for long-read splice alignment [65],  
308 but these seeds are more computationally expensive to compute and are typically slower  
309 than single-query seed-based algorithms.

310 **Anchors from minimal confidently alignable substrings (MCASs)** If a query was sampled  
311 from a repetitive region in the reference, one may likely find several clusters of anchors  
312 across the reference. Further dynamic programming operations to decipher the true origin  
313 region of the query are typically costly or even unfeasible if too many copies have to be  
314 considered. Even in the case a query is located on the reference, it might be attributed to the  
315 wrong copy because of the sequencing errors. A recent contribution [34] proposed a solution  
316 for handling seeding in repetitive regions. The procedure finds smallest subsequences that  
317 *uniquely* match (MCASs) between the query and the reference (see (f) in Figure 2). There  
318 can be as many as the query length in theory. In practice, the more the repeats are divergent,  
319 the shortest the MCASs since a base pertaining to a single copy is more likely to be met.  
320 MCASs are computed using an alignment procedure, which means that *uniquely* matched  
321 must be understood as a relative property. For each position on a query, the best and  
322 second-best alignment scores are compared, and a substring is considered uniquely matched if  
323 the difference between the scores is above a threshold. It is interesting to bound the maximal  
324 size of MCASs, both for performance purposes and because they may become less specific as  
325 to their size increase. Fixed-size, exact match anchors (minimizers) are then extracted from  
326 MCAS regions.

## 327 3.2 Implementation of the seeding step

### 328 3.2.1 Seeds transformations before indexing

329 Originally, minimizers use a lexicographical ordering. However, in our four base alphabet,  
330 this can tend to select sequences starting with long alphabetically smaller runs such as  
331 "AAA...". Random hash functions assigning each  $k$ -mer a value between 0 and a maximum  
332 integer are preferred [67].

333 Oxford Nanopore reads are known for accumulating errors in homopolymers, typically  
334 adding/removing a base in a stretch of a single nucleotide. Sequences can be homopolymer-

## 10 A survey of long-read mapping

335 compressed before finding  $k$ -mers. Homopolymers longer than a size  $s$  are reduced to a single  
336 base, then  $k$ -mers are computed over the compressed sequence. For instance, for  $s = 3$ ,  $k = 4$ ,  
337 an original sequence ATTTTGAAAACC is compressed to ATGACC, and the final  $k$ -mers  
338 are ATGA, TGAC, GACC. This procedure allows finding more anchors while indexing fewer  
339  $k$ -mers/minimizers. Homopolymer compression is ubiquitous in long-read mappers.

340 In regions of low complexity (e.g. ATATATA, CCCCC) the standard minimizer procedure  
341 keeps all minimal  $k$ -mers in windows. It is then possible for two  $k$ -mers to get the minimal  
342 value and to be selected, which tends to over-sample repetitive  $k$ -mers. A *robust winnowing*  
343 procedure is proposed in [35], which avoids the over-sampling effect by selecting fewer copies  
344 of a  $k$ -mer, but increases the context dependency phenomenon.

### 345 3.2.2 Hash tables prevail for seed indexing

346 Indexing of fixed size is usually done using hash tables (although FM-indexes for  $k$ -mers  
347 exist [8]). In the context of subsampling, invertible hash functions have been a key asset for  
348 using minimizers as  $k$ -mers representatives. In other words, a hash value is associated with  
349 one and only one  $k$ -mer, and the  $k$ -mer sequence can be retrieved from the hash value (using  
350 reciprocal operations). This choice allows a very fast  $k$ -mer/minimizer correspondence but  
351 is costly as it implies that the fingerprints of the hash table are not compressed (which is  
352 mitigated by the subsampling). Minimizers are then used to populate a hash table, which  
353 associates them to their position(s) in the reference and their strand information (usually  
354 hashed seeds are canonical  $k$ -mers: the smallest lexicographic sequence between the original  
355  $k$ -mer and its reverse complement).

356 Variable-length seeds are indexed in full-text data structures (suffix arrays, FM-index),  
357 which allow to find and count arbitrarily long queries in the reference. They have been  
358 used in the first versions of long-read mappers. Variable-length seeds type can be longer to  
359 query in the structure, while hashed matches are queried in constant time. Since minimizers  
360 represent fixed-length  $k$ -mers, hash table solutions mainly prevail.

### 361 3.2.3 Seeds selection at the query

362 In [43], it is proposed to select all minimizers from the reference during the indexing phase  
363 (although the latest versions include the weighted  $k$ -mers and robust winnowing heuristics),  
364 and to soft mask some representative  $k$ -mers at the query. The procedure simply avoids  
365  $k$ -mers seen too many times according to a fixed cutoff. The authors noticed that in cases  
366 where a query is sampled from a repetitive region, such a procedure prevents it to be seeded.  
367 Therefore, an update was proposed [44], which detects if low occurrence  $k$ -mers are too  
368 far away in a query, and in this case, allows sampling minimizers in the repetitive region  
369 in between (and keeps some of the lowest possible occurrences among these minimizers).  
370 Techniques that use longer fuzzy seeds (e.g., strobemers) [22] reduce the number of masked  
371 regions, although it comes at the cost of sensitivity. Another approach [61] computes a new  
372 set of minimizers on the targeted reference region in order to obtain finer candidate chains,  
373 in particular in repeated or low complexity regions.

374 **3.3 Chaining is dominated by dynamic programming with concave gap**  
375 **score functions**

376 **3.3.1 A dynamic programming problem**

377 Once the reference's seeds are indexed, a set of seeds is extracted from the query and looked  
378 up in the index to find anchors. Anchors' positions on the query and reference are stored,  
379 as well as the forward/reverse information. Instead of directly extending the alignment  
380 between anchors, as it is done in short-read mapping, a step of chaining is added and meant  
381 to accelerate further extensions. Chaining acts as a filter and a guide for smaller extensions  
382 that need to be realized only between selected anchor pairs. Without it, too many extension  
383 procedures, most of which would be dead-ends, would have to be started.

384 In an ideal case, there is a unique way of ordering anchors by ascending Cartesian  
385 positions in the (*reference, query*) space, which passes by all the anchors. In practice, some  
386 anchors are spurious, others correspond to repeated regions and yield different possible chains.  
387 Moreover, over parameters have to be taken into account. Thus, methods optimize different  
388 aspects (also illustrated in Figure 3):

389 A1) Do not allow anchors which are not ascending either by the anchors' start or end  
390 coordinates in both the query and reference (see first case in Figure 3).

391 A2) Avoid discrepancies in diagonals between anchors (second case in Figure 3).

392 A3) Do not allow large spaces between consecutive anchors of the chain (see third case in  
393 Figure 3).

394 A4) Favor the longest possible anchor chain (fourth case in Figure 3).

395 A5) If inexact matches in seeds are possible, find a series of anchors ensuring a minimal  
396 Levenshtein distance between the query and the reference.

397 The problem of finding an optimal chain using non-overlapping anchors has been called  
398 the *local chaining problem* [1], although in this application anchors can overlap. The score  
399  $f(i + 1)$  represents the cost of appending an anchor  $a_{i+1}$  to  $a_i$  to the chain. This score is  
400 often called the *gap score* in the literature, though it includes other constraints, as described  
401 above. The chaining problem for long reads seeks to find an optimal colinear chain with a  
402 positive gap score.

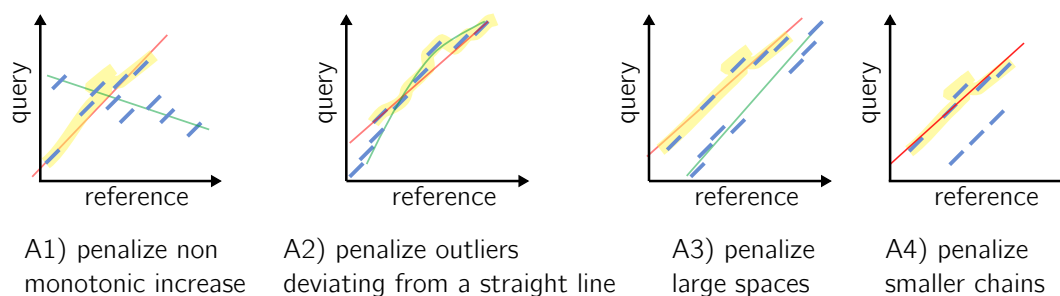

■ **Figure 3** An illustration of the different constraint taken into account in the gap score functions. The reference axis shows a genome region of interest where anchors were found, not the whole reference. A1–A4 correspond to items in the text in section 3.3.1. Anchors are showed in blue. The selected chain with respect to the described constraint is highlighted in yellow and a line approximately passing by its anchors is showed in red. The line passing by the longest chain is showed in green.

403 Mainly, methods use either a two-step approach: 1-find rough clusters of seeds as putative  
404 chains, followed by 2-find the best scored chain among the selected clusters; or work in

## 12 A survey of long-read mapping

405 a single pass and apply a custom dynamic programming solution to find the best anchor  
406 chain. We can start by noting that one of the first mappers dedicated to long-reads solved  
407 a global chaining problem to determine a chain of maximum score, by fixing starting and  
408 ending points (anchors) such that their interval is roughly the size of the query [12]. Such an  
409 approach would easily discard long gaps and spaces in alignments.

### 410 3.3.2 Chaining in two steps

411 **Clusters of seeds are found through single-linkage in 2D space** The two-step approaches  
412 rely on a first clustering step. Although it tends to be replaced by single-step chaining (see  
413 Section 3.3.3), in the following we describe the fundamental ideas of the clustering. Methods  
414 first find rough clusters of anchors by considering a discrete (*reference, query*) position  
415 space. In this space, an anchor realizing a perfect match is a line of the size of the seed.  
416 This line should have a 45-degree angle, which also corresponds to the main diagonal of a  
417 (*reference, query*) alignment matrix. The same idea stands for a set of anchors. However,  
418 because of insertions and deletions, each small line materializing an anchor may not be on  
419 the exact same diagonal, thus realizing approximate lines in the (*reference, query*) space. A  
420 method from image processing has been proposed to find approximate lines in this space:  
421 the *Hough transform* [17], which makes it possible to detect imperfect straight lines in 2D  
422 space. Contrary to linear regression which would output the best line explained by the  
423 anchor distribution, here an arbitrary number of straight lines can be output and considered  
424 (see Supplementary Figure S4 for an illustration). Hough transform or other similar anchor  
425 grouping algorithms ([61] proposes to delineate fine-grained clusters in order to increase the  
426 chaining specificity in repeated regions) all can be assimilated to single-linkage clustering in  
427 2D space, which finds groups of anchors placed roughly on the same diagonal.

428 **Anchor chaining using longest subsequences of anchors** The previous clustering techniques  
429 aim at finding lines in groups of anchors that can be approximately colinear. To determine  
430 truly colinear chains, a subset of anchors can be ordered by finding a longest increasing  
431 subsequence (LIS) of anchors. Let each anchor be mapped to  $1 \dots n$  integers. The LIS  
432 problem consists in finding a longest increasing subsequence from a permutation  $P$  of the set  
433  $\{1, 2, \dots, c\}$ , which can be solved in  $\mathcal{O}(c \times \log(c))$ .

434 In the case of exact fuzzy seeds, inexact matches are to be dealt with on top of the  
435 initial increasing chain problem. Indeed, one wants to obtain the closest base-wise anchor  
436 chain. In this case, the problem is converted to LCS $_k$  (longest common subsequence in at  
437 least  $k$ -length substrings). Note that there is a correspondence between LIS and LCS. The  
438 LIS of  $P$  is the LCS between  $P$  and the sequence  $(1, 2, \dots, c)$ . In both cases, neither the  
439 longest nor the increasing requirements are sufficient to find correct anchor chains: they lack  
440 definitions for other constraints, such as distance between anchors or the possibility to allow  
441 large gaps. They are complemented with heuristics or replaced by more recent approaches in  
442 Section 3.3.3. In addition, several methods use graphs built over anchors as backbones to  
443 the chaining and alignment steps [73, 49, 71] (one approach is described in the Appendix).  
444 Because they would fail to take into account distances between anchors, these methods have  
445 been replaced by dynamic programming approaches relying on gap score functions.

### 446 3.3.3 Chaining in a single step: gap score functions

447 The main drawback of the approaches previously described in 3.3.2 is that though large  
448 spaces between two anchors of a pair must be avoided, some spaces correspond to gaps in

449 the alignment and can be kept. In order to deal concurrently with these two problems, most  
450 recent methods drop the two-step clustering and LIS to directly apply a custom dynamic  
451 programming solution. It is globally the same spirit as LIS, but integrates a more fine-  
452 grained gap penalty solution. It defines a cost function that grants a maximum penalty for  
453 non-monotonic increasing seed chains.

454 **Concave gap functions** The cost function is designed to handle the gaps induced by frequent  
455 indels in the data. Intuitively, it is likely that indels happen in clusters of  $n$  positions rather  
456 than at  $n$  independent positions in the chain because some regions on the query might be  
457 particularly spurious, or because of local repeats on the reference. Therefore, the same cost  
458 is not attributed to opening a gap and extending a gap, thus a linear gap function does  
459 not fit. The choice of gap functions which are concave (verifying the *Quadrangle Inequality*)  
460 improves the time complexity by using the *wider is worse* strategy [25, 21]. In practice,  
461 these concave gap functions are affine, a set of affine functions, or a combination of affine  
462 and log functions, as proposed in [43]. We chose to present `minimap2`'s [43] gap functions in  
463 Figure 4 as they are adopted without modifications in most current papers (with the recent  
464 exception of [61]). Chains are built by aggregating close anchors of smaller coordinates to  
465 the current anchor by penalizing the shifts compared to the main diagonal. In Figure 4,  
466 Panel 4a presents how the set of possible anchors to prolong the chain is selected. Panel 4b  
467 illustrates the dynamic function's parameters. The complete description of the functions is  
468 available in the Appendix.

469 Heuristics are applied to rapidly drop a dynamic programming procedure in regions  
470 that are unlikely to align and to avoid  $O(c^2)$  worst cases. Based on empirical results, these  
471 heuristics mostly check if seeds are not separated by too large regions and drop the chaining  
472 procedure if the score becomes too low.

473 **Solutions for large gaps** Noticing that [43]'s original approach would be failing in large  
474 gaps, one contribution [61] proposed techniques to perform dynamic programming with a  
475 family of concave functions by relying on a previous work [21] (built on a prior clustering  
476 step as described in 3.3.2). Recently, [43] integrated a solution designed for mapping long  
477 structural variants in pangenomic graphs [45]. Its recent versions entail a cost function for  
478 regular gaps, and a long gap patching procedure. Then it chooses the cheapest solution to  
479 move on to the alignment step. The gap patching procedure uses a linear gap cost so that it  
480 has a higher long-gap opening cost in comparison to the regular procedure but at a cheaper  
481 extending cost. The chaining with a linear function is solved with a range minimum query  
482 (RMQ) algorithm using a balanced binary search tree [1, 59]. It allows to solve the linear  
483 chaining in  $\mathcal{O}(c \times \log(c))$ . Although this time complexity can be improved in  $\mathcal{O}(c)$  by using  
484 range maximum queue [11], the implemented algorithm is more costly than the solution for  
485 regular gaps, which is preferred if possible. Panel 4c in Figure 4 illustrates the dynamic  
486 function for large gaps.

### 487 3.3.4 Mapping quality scores have been adapted for ranking chains

488 The described methods may deliver a set of chains that satisfies the chaining score threshold.  
489 To choose among the candidates and decide the final location, chains can then be categorized  
490 into primary/secondary chains. Chains with a sufficient score are ranked from highest to  
491 lowest score. Primary chains are those with the highest scores which do not overlap with  
492 another ranked chain for the most of their length. Secondary chains are others. Mapping  
493 quality, which is a measure that had been introduced to assess short-reads mapping, is

## 14 A survey of long-read mapping

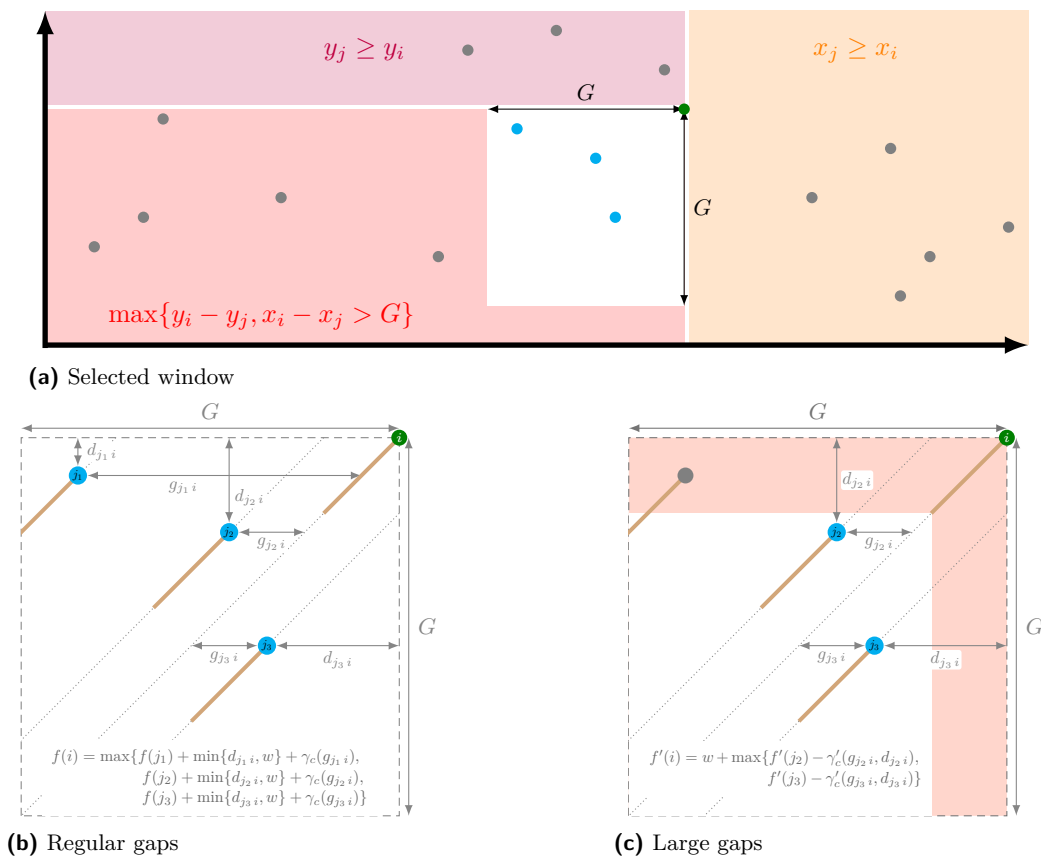

■ **Figure 4** Outline of chaining of `minimap2`. Figure a shows for an anchor (in green) the selected region (in white,  $G$  is the gap threshold) to find available anchors to continue chaining (in blue). Figures b and c give respectively the dynamic programming functions for regular and large gaps size. Anchors are shown as segments ending with green or blue dots with the same color as in Figure a. Besides, for the large gap size (Figure c), to improve the complexity, the anchors do not overlap (available anchors are not in the red zone).  $d_{ji}$  represents the smallest "distance" between the two anchors (but is not really a distance by definition),  $w$  is the minimizer window size,  $g_{ji}$  is the gap length, and the  $\gamma$  functions are the concave gap functions.

494 redefined for long-reads with slight variations according to articles. It reports, for chains,  
 495 whether the primary is very far in terms of score from the best secondary, and if it is long  
 496 enough.

## 497 **4** Extension step and final alignment computation

498 **Extension step** In order to allow gaps, the methods rely on local alignment between  
 499 pairs of successive anchors using classical algorithms [27, 57] derived from Needleman and  
 500 Wunsch [58]. They are based on alignment matrices, which aggregate the base-wise alignment  
 501 scores from the two prefixes (top left of the matrix) to the two suffixes (bottom right).

502 To compute the scores and report them in a matrix, affine cost functions allow to allocate  
 503 different penalties for opening and extending gaps and therefore can favor short or long  
 504 gaps. More precisely, such algorithms use pairs of affine gap score functions and choose the  
 505 cheapest cost between the scoring for short gaps (i.e. less costly to open, costly to extend),

506 and the scoring for long gaps (i.e., more costly to open, cheap to extend). Allowing long gaps  
507 has a drastic negative impact on the alignment efficiency because more cells in the alignment  
508 matrix have to be considered.

509 **Heuristics for speed-up and quality enhancement** Therefore, alignment is commonly  
510 accelerated through vectorization, using single instruction multiple data (SIMD) sets of  
511 instructions, which increase the computational throughput by passing simultaneously several  
512 matrix cells for the processors to evaluate. Second, practical alignment implementation  
513 relies on banded alignment, which, simply put, bounds the alignment matrix in a band of  
514 size  $\ell$  around the top-left – bottom-right diagonal. Inspired from BLAST’s X-drop [4], [43]  
515 implements a Z-drop procedure. X-drop quits extending the alignment if the maximum score  
516 reached at some point when aligning the prefix drops by more than X. Z-drop adds the  
517 possibility not to drop the extension during large gaps.

518 Due to sequencing errors, some spurious anchors main remain in a chain, which can  
519 lead to a suboptimal alignment. At the alignment step, [43] chooses to remove anchors that  
520 produce an insertion and a deletion at the same time ( $>10\text{bp}$ ) or that lead to a long gap at  
521 the extremity of a chain. Another solutions [12] involves to re-compute a chain with novel  
522 anchors computed on a window that comprises the alignment.

## 523 **5 Future directions**

524 On top of mentioned novel seeding techniques bringing new properties concerning their  
525 coverage of the seeded sequence and robustness to errors and mutations (syncmers, strobe-  
526 mers [70, 60, 22]), we can expect to see advances in the chaining and extending parts in the  
527 coming months.

528 Indeed, the usage of *diagonal-transition algorithms* which was initially define for edit  
529 distance [72, 39, 30] has been reactivated recently for the gap-affine model with the wavefront  
530 alignment algorithm (WFA, including [52, 51, 19]). More precisely, instead of using dynamic  
531 programming on the adjacent cells, WFA transposes the optimization problem on the  
532 diagonals and the score. In particular, WFA has the potential to make computation faster  
533 for similar sequences and large gaps (by setting the score accordingly and adapting the  
534 scoring). A current result shows that we can exploit the massive parallel capabilities of  
535 modern GPU devices to accelerate this wavefront alignment algorithm [2]. Currently, different  
536 implementations exist that have been tested on long reads [52]<sup>4</sup>, although no dedicated  
537 long-read mapper integrates them yet.

## 538 **References**

- 539 **1** Mohamed Ibrahim Abouelhoda and Enno Ohlebusch. A local chaining algorithm and its applic-  
540 ations in comparative genomics. In *International Workshop on Algorithms in Bioinformatics*,  
541 pages 1–16. Springer, 2003.
- 542 **2** Quim Aguado-Puig, Santiago Marco-Sola, Juan Carlos Moure, Christos Matzoros, David  
543 Castells-Rufas, Antonio Espinosa, and Miquel Moreto. Wfa-gpu: Gap-affine pairwise alignment  
544 using gpus. *bioRxiv*, 2022.

<sup>4</sup> <https://github.com/waveygang/wfmash/blob/master/README.md>,  
miniwfa

<https://github.com/lh3/>

## 16 A survey of long-read mapping

- 545 3 Mohammed Alser, Jeremy Rotman, Dhriti Deshpande, Kodi Taraszka, Huwenbo Shi, Pelin Icer  
546 Baykal, Harry Taegyun Yang, Victor Xue, Sergey Knyazev, Benjamin D Singer, et al. Techno-  
547 logy dictates algorithms: recent developments in read alignment. *Genome biology*, 22(1):1–34,  
548 2021.
- 549 4 Stephen F Altschul, Warren Gish, Webb Miller, Eugene W Myers, and David J Lipman. Basic  
550 local alignment search tool. *Journal of molecular biology*, 215(3):403–410, 1990.
- 551 5 Mohammad Ruhul Amin, Steven Skiena, and Michael C Schatz. Nanoblaster: Fast alignment  
552 and characterization of oxford nanopore single molecule sequencing reads. In *2016 IEEE 6th  
553 International Conference on Computational Advances in Bio and Medical Sciences (ICCABS)*,  
554 pages 1–6. IEEE, 2016.
- 555 6 Mahdi Belbasi, Antonio Blanca, Robert S Harris, David Koslicki, and Paul Medvedev. The  
556 minimizer jaccard estimator is biased and inconsistent. *bioRxiv*, 2022.
- 557 7 Konstantin Berlin, Sergey Koren, Chen-Shan Chin, James P Drake, Jane M Landolin, and  
558 Adam M Phillippy. Assembling large genomes with single-molecule sequencing and locality-  
559 sensitive hashing. *Nature biotechnology*, 33(6):623–630, 2015.
- 560 8 Alexander Bowe, Taku Onodera, Kunihiko Sadakane, and Tetsuo Shibuya. Succinct de bruijn  
561 graphs. In *International workshop on algorithms in bioinformatics*, pages 225–235. Springer,  
562 2012.
- 563 9 Andrei Z Broder. On the resemblance and containment of documents. In *Proceedings.  
564 Compression and Complexity of SEQUENCES 1997 (Cat. No. 97TB100171)*, pages 21–29.  
565 IEEE, 1997.
- 566 10 Karel Brinda, Maciej Sykulski, and Gregory Kucherov. Spaced seeds improve k-mer-based  
567 metagenomic classification. *Bioinformatics*, 31(22):3584–3592, 07 2015. [arXiv:https://  
568 academic.oup.com/bioinformatics/article-pdf/31/22/3584/5027960/btv419.pdf](https://academic.oup.com/bioinformatics/article-pdf/31/22/3584/5027960/btv419.pdf), doi:  
569 10.1093/bioinformatics/btv419.
- 570 11 Bastien Cazaux, Dmitry Kosolobov, Veli Mäkinen, and Tuukka Norri. Linear time maximum  
571 segmentation problems in column stream model. In *International Symposium on String  
572 Processing and Information Retrieval*, pages 322–336. Springer, 2019.
- 573 12 Mark J Chaisson and Glenn Tesler. Mapping single molecule sequencing reads using basic local  
574 alignment with successive refinement (blasr): application and theory. *BMC bioinformatics*,  
575 13(1):1–18, 2012.
- 576 13 Angana Chakraborty, Burkhard Morgenstern, and Sanghamitra Bandyopadhyay. S-conlsh:  
577 Alignment-free gapped mapping of noisy long reads. *BMC bioinformatics*, 22(1):1–18, 2021.
- 578 14 Moses S Charikar. Similarity estimation techniques from rounding algorithms. In *Proceedings  
579 of the thirty-fourth annual ACM symposium on Theory of computing*, pages 380–388, 2002.
- 580 15 Chen-Shan Chin and Asif Khalak. Human genome assembly in 100 minutes. *BioRxiv*, page  
581 705616, 2019.
- 582 16 Arthur L Delcher, Simon Kasif, Robert D Fleischmann, Jeremy Peterson, Owen White, and  
583 Steven L Salzberg. Alignment of whole genomes. *Nucleic acids research*, 27(11):2369–2376,  
584 1999.
- 585 17 Richard O Duda and Peter E Hart. Use of the hough transformation to detect lines and curves  
586 in pictures. *Communications of the ACM*, 15(1):11–15, 1972.
- 587 18 Robert Edgar. Syncmers are more sensitive than minimizers for selecting conserved k-mers in  
588 biological sequences. *PeerJ*, 9:e10805, 2021.
- 589 19 Jordan M Eizenga and Benedict Paten. Improving the time and space complexity of the wfa  
590 algorithm and generalizing its scoring. *bioRxiv*, 2022.
- 591 20 Marquita Ellis, Giulia Guidi, Aydın Buluç, Leonid Olikier, and Katherine Yelick. dibella:  
592 Distributed long read to long read alignment. In *Proceedings of the 48th International  
593 Conference on Parallel Processing*, pages 1–11, 2019.
- 594 21 David Eppstein, Zvi Galil, Raffaele Giancarlo, and Giuseppe F Italiano. Sparse dynamic  
595 programming ii: convex and concave cost functions. *Journal of the ACM (JACM)*, 39(3):546–  
596 567, 1992.



- 597 22 Can Firtina, Jisung Park, Jeremie S Kim, Mohammed Alser, Damla Senol Cali, Taha Shahroodi,  
598 Nika Mansouri Ghiasi, Gagandeep Singh, Konstantinos Kanellopoulos, Can Alkan, et al. Blend:  
599 A fast, memory-efficient, and accurate mechanism to find fuzzy seed matches. *arXiv preprint*  
600 *arXiv:2112.08687*, 2021.
- 601 23 Martin C Frith, Laurent Noé, and Gregory Kucherov. Minimally overlapping words for  
602 sequence similarity search. *Bioinformatics*, 36(22-23):5344–5350, 2020.
- 603 24 Yilei Fu, Medhat Mahmoud, Vignesh Vaibhav Muraliraman, Fritz J Sedlazeck, and Todd J  
604 Treangen. Vulcan: Improved long-read mapping and structural variant calling via dual-mode  
605 alignment. *GigaScience*, 10(9):giab063, 2021.
- 606 25 Zvi Galil and Kunsoo Park. A linear-time algorithm for concave one-dimensional dynamic  
607 programming. *Information Processing Letters*, 1989.
- 608 26 Eldar Giladi, John Healy, Gene Myers, Chris Hart, Philipp Kapranov, Doron Lipson, Steve  
609 Roels, Edward Thayer, and Stan Letovsky. Error tolerant indexing and alignment of short  
610 reads with covering template families. *J Comput Biol*, 17(10), Oct 2010.
- 611 27 Osamu Gotoh. Optimal sequence alignment allowing for long gaps. *Bulletin of mathematical*  
612 *biology*, 52(3):359–373, 1990.
- 613 28 Ehsan Haghshenas, S Cenk Sahinalp, and Faraz Hach. lordfast: sensitive and fast alignment  
614 search tool for long noisy read sequencing data. *Bioinformatics*, 35(1):20–27, 2019.
- 615 29 Renmin Han, Yu Li, Xin Gao, and Sheng Wang. An accurate and rapid continuous wavelet  
616 dynamic time warping algorithm for end-to-end mapping in ultra-long nanopore sequencing.  
617 *Bioinformatics*, 34(17):i722–i731, 2018.
- 618 30 Heikki Hyyrö. A bit-vector algorithm for computing levenshtein and damerau edit distances.  
619 *Nord. J. Comput.*, 10(1):29–39, 2003.
- 620 31 Lucian Ilie and Silvana Ilie. Multiple spaced seeds for homology search. *Bioinform-*  
621 *atics*, 23(22):2969–2977, 09 2007. [arXiv:https://academic.oup.com/bioinformatics/  
622 article-pdf/23/22/2969/543804/btm422.pdf](https://academic.oup.com/bioinformatics/article-pdf/23/22/2969/543804/btm422.pdf), doi:10.1093/bioinformatics/btm422.
- 623 32 Silvana Ilie. Efficient computation of spaced seeds. *BMC research notes*, 5:123–123, 02 2012.
- 624 33 Chirag Jain, Alexander Dilthey, Sergey Koren, Srinivas Aluru, and Adam M Phillippy. A fast  
625 approximate algorithm for mapping long reads to large reference databases. In *International*  
626 *Conference on Research in Computational Molecular Biology*, pages 66–81. Springer, 2017.
- 627 34 Chirag Jain, Arang Rhie, Nancy F Hansen, Sergey Koren, and Adam M Phillippy. Long-read  
628 mapping to repetitive reference sequences using winnowmap2. *Nature Methods*, pages 1–6,  
629 2022.
- 630 35 Chirag Jain, Arang Rhie, Haowen Zhang, Claudia Chu, Brian P Walenz, Sergey Koren, and  
631 Adam M Phillippy. Weighted minimizer sampling improves long read mapping. *Bioinformatics*,  
632 36(Supplement\_1):i111–i118, 2020.
- 633 36 W James Kent. Blat—the blast-like alignment tool. *Genome research*, 12(4):656–664, 2002.
- 634 37 Szymon M Kielbasa, Raymond Wan, Kengo Sato, Paul Horton, and Martin C Frith. Adaptive  
635 seeds tame genomic sequence comparison. *Genome research*, 21(3):487–493, 2011.
- 636 38 Sam Kovaka, Yunfan Fan, Bohan Ni, Winston Timp, and Michael C Schatz. Targeted nanopore  
637 sequencing by real-time mapping of raw electrical signal with uncalled. *Nature biotechnology*,  
638 39(4):431–441, 2021.
- 639 39 Gad M Landau and Uzi Vishkin. Fast parallel and serial approximate string matching. *Journal*  
640 *of algorithms*, 10(2):157–169, 1989.
- 641 40 Roy Lederman. A random-permutations-based approach to fast read alignment. In *BMC*  
642 *bioinformatics*, volume 14, pages 1–10. BioMed Central, 2013.
- 643 41 Heng Li. Aligning sequence reads, clone sequences and assembly contigs with bwa-mem. *arXiv*  
644 *preprint arXiv:1303.3997*, 2013.
- 645 42 Heng Li. Minimap and minimiasm: fast mapping and de novo assembly for noisy long sequences.  
646 *Bioinformatics*, 32(14):2103–2110, 2016.
- 647 43 Heng Li. Minimap2: pairwise alignment for nucleotide sequences. *Bioinformatics*, 34(18):3094–  
648 3100, 2018.

## 18 A survey of long-read mapping

- 649 **44** Heng Li. New strategies to improve minimap2 alignment accuracy. *Bioinformatics*, 37(23):4572–  
650 4574, 2021.
- 651 **45** Heng Li, Xiaowen Feng, and Chong Chu. The design and construction of reference pangenome  
652 graphs with minigraph. *Genome biology*, 21(1):1–19, 2020.
- 653 **46** Ming Li, Bin Ma, Derek Kisman, and John Tromp. Patternhunter ii: highly sensitive and fast  
654 homology search. *J Bioinform Comput Biol*, 2(3):417–439, Sep 2004.
- 655 **47** Hsin-Nan Lin and Wen-Lian Hsu. Kart: a divide-and-conquer algorithm for ngs read alignment.  
656 *Bioinformatics*, 33(15):2281–2287, 2017.
- 657 **48** Bo Liu, Yan Gao, and Yadong Wang. Lamsa: fast split read alignment with long approximate  
658 matches. *Bioinformatics*, 33(2):192–201, 2017.
- 659 **49** Bo Liu, Dengfeng Guan, Mingxiang Teng, and Yadong Wang. rHAT: fast alignment of noisy  
660 long reads with regional hashing. *Bioinformatics*, 32(11):1625–1631, 11 2015. [arXiv:https://  
661 academic.oup.com/bioinformatics/article-pdf/32/11/1625/22645531/btv662.pdf](https://academic.oup.com/bioinformatics/article-pdf/32/11/1625/22645531/btv662.pdf), doi:  
662 10.1093/bioinformatics/btv662.
- 663 **50** Bo Liu, Yadong Liu, Junyi Li, Hongzhe Guo, Tianyi Zang, and Yadong Wang. desalt: fast  
664 and accurate long transcriptomic read alignment with de bruijn graph-based index. *Genome  
665 biology*, 20(1):1–14, 2019.
- 666 **51** Santiago Marco-Sola, Jordan M Eizenga, Andrea Guarracino, Benedict Paten, Erik Garrison,  
667 and Miquel Moreto. Optimal gap-affine alignment in  $o(s)$  space. *bioRxiv*, 2022.
- 668 **52** Santiago Marco-Sola, Juan Carlos Moure, Miquel Moreto, and Antonio Espinosa. Fast  
669 gap-affine pairwise alignment using the wavefront algorithm. *Bioinformatics*, 37(4):456–463,  
670 2021.
- 671 **53** Josip Marić, Ivan Sović, Krešimir Križanović, Niranjana Nagarajan, and Mile Šikić. Graphmap2-  
672 splice-aware rna-seq mapper for long reads. *bioRxiv*, page 720458, 2019.
- 673 **54** Frédéric Meunier, Olivier Gandouet, Éric Fusy, and Philippe Flajolet. Hyperloglog: the analysis  
674 of a near-optimal cardinality estimation algorithm. *Discrete Mathematics & Theoretical  
675 Computer Science*, 2007.
- 676 **55** Alla Mikheenko, Andrey V Bzikadze, Alexey Gurevich, Karen H Miga, and Pavel A Pevzner.  
677 Tandemtools: mapping long reads and assessing/improving assembly quality in extra-long  
678 tandem repeats. *Bioinformatics*, 36(Supplement\_1):i75–i83, 2020.
- 679 **56** Hamid Mohamadi, Justin Chu, Benjamin P Vandervalk, and Inanc Birol. nthash: recursive  
680 nucleotide hashing. *Bioinformatics*, 32(22):3492–3494, 2016.
- 681 **57** Gene Myers. A fast bit-vector algorithm for approximate string matching based on dynamic  
682 programming. *Journal of the ACM (JACM)*, 46(3):395–415, 1999.
- 683 **58** Saul B Needleman and Christian D Wunsch. A general method applicable to the search  
684 for similarities in the amino acid sequence of two proteins. *Journal of molecular biology*,  
685 48(3):443–453, 1970.
- 686 **59** Christian Otto, Steve Hoffmann, Jan Gorodkin, and Peter F Stadler. Fast local fragment  
687 chaining using sum-of-pair gap costs. *Algorithms for Molecular Biology*, 6(1):1–8, 2011.
- 688 **60** David Pellow, Abhinav Dutta, and Ron Shamir. Using syncmers improves long-read mapping.  
689 *bioRxiv*, 2022.
- 690 **61** Jingwen Ren and Mark JP Chaisson. Ira: A long read aligner for sequences and contigs. *PLOS  
691 Computational Biology*, 17(6):e1009078, 2021.
- 692 **62** Michael Roberts, Wayne Hayes, Brian R Hunt, Stephen M Mount, and James A Yorke.  
693 Reducing storage requirements for biological sequence comparison. *Bioinformatics*, 20(18):3363–  
694 3369, 2004.
- 695 **63** Kristoffer Sahlin. Effective sequence similarity detection with strobemers. *Genome research*,  
696 31(11):2080–2094, 2021.
- 697 **64** Kristoffer Sahlin. Faster short-read mapping with strobemer seeds in syncmer space. *bioRxiv*,  
698 2021.
- 699 **65** Kristoffer Sahlin and Veli Mäkinen. Accurate spliced alignment of long rna sequencing reads.  
700 *Bioinformatics*, 37(24):4643–4651, 2021.

- 701 **66** Kristoffer Sahlin and Paul Medvedev. Error correction enables use of oxford nanopore  
702 technology for reference-free transcriptome analysis. *Nature communications*, 12(1):1–13, 2021.
- 703 **67** Saul Schleimer, Daniel S Wilkerson, and Alex Aiken. Winnowing: local algorithms for  
704 document fingerprinting. In *Proceedings of the 2003 ACM SIGMOD international conference*  
705 *on Management of data*, pages 76–85, 2003.
- 706 **68** Fritz J Sedlazeck, Philipp Rescheneder, Moritz Smolka, Han Fang, Maria Nattestad, Arndt  
707 Von Haeseler, and Michael C Schatz. Accurate detection of complex structural variations  
708 using single-molecule sequencing. *Nature methods*, 15(6):461–468, 2018.
- 709 **69** Kishwar Shafin, Trevor Pesout, Ryan Lorig-Roach, Marina Haukness, Hugh E Olsen, Colleen  
710 Bosworth, Joel Armstrong, Kristof Tigyi, Nicholas Maurer, Sergey Koren, et al. Nanopore  
711 sequencing and the shasta toolkit enable efficient de novo assembly of eleven human genomes.  
712 *Nature biotechnology*, 38(9):1044–1053, 2020.
- 713 **70** Jim Shaw and Yun William Yu. Theory of local k-mer selection with applications to long-read  
714 alignment. *bioRxiv*, 2021.
- 715 **71** Ivan Sović, Mile Šikić, Andreas Wilm, Shannon Nicole Fenlon, Swaine Chen, and Niranjan  
716 Nagarajan. Fast and sensitive mapping of nanopore sequencing reads with graphmap. *Nature*  
717 *communications*, 7(1):1–11, 2016.
- 718 **72** Esko Ukkonen. Algorithms for approximate string matching. *Information and control*, 64(1-  
719 3):100–118, 1985.
- 720 **73** Ze-Gang Wei, Xing-Guo Fan, Hao Zhang, Xiao-Dan Zhang, Fei Liu, Yu Qian, and Shao-Wu  
721 Zhang. kngmap: sensitive and fast mapping algorithm for noisy long reads based on the k-mer  
722 neighborhood graph. *Frontiers in Genetics*, page 988, 2022.
- 723 **74** Thomas D Wu and Colin K Watanabe. Gmap: a genomic mapping and alignment program  
724 for mrna and est sequences. *Bioinformatics*, 21(9):1859–1875, 2005.
- 725 **75** Chuan-Le Xiao, Ying Chen, Shang-Qian Xie, Kai-Ning Chen, Yan Wang, Yue Han, Feng Luo,  
726 and Zhi Xie. Mecat: fast mapping, error correction, and de novo assembly for single-molecule  
727 sequencing reads. *nature methods*, 14(11):1072–1074, 2017.
- 728 **76** Haowen Zhang, Haoran Li, Chirag Jain, Haoyu Cheng, Kin Fai Au, Heng Li, and Srinivas Aluru.  
729 Real-time mapping of nanopore raw signals. *Bioinformatics*, 37(Supplement\_1):i477–i483,  
730 2021.

## 20 A survey of long-read mapping

### 731 Appendix

732 **Details on subsampling techniques** In Supplementary Figure S1, we present an example of the difference in the selected bases between a minimizer approach and a syncmer approach.

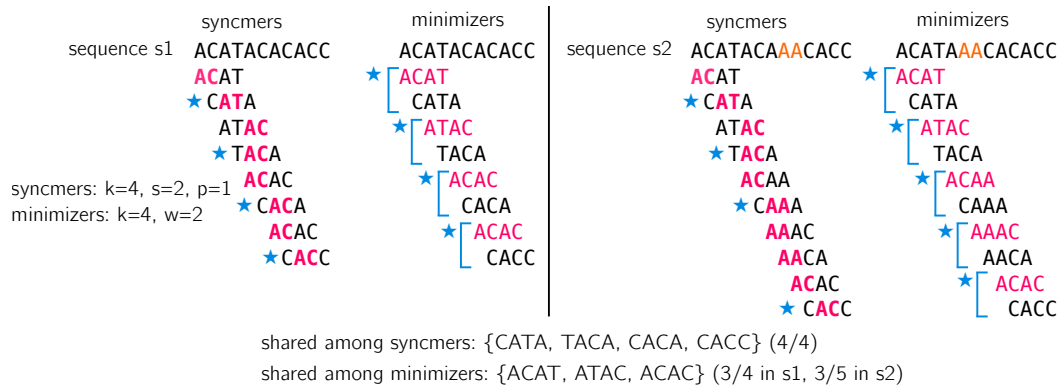

733

734 **Figure S1** Usage syncmers and minimizers for comparing two similar sequences. Sequences s1 and s2 differ by a AA insertion in orange in S2. We show how selected syncmers and minimizers do not produce the same sets of representative  $k$ -mers and therefore yield different fractions of shared  $k$ -mers between s1 and s2. The  $k$ -mer size is 4, the  $s$ -mers in syncmers (smallest showed in pink, we choose the lexicographic order) are of size 2, and in this example we require that the smallest  $s$ -mer appears at the first position of the  $k$ -mer. Minimizers have windows of size 2, materialized in blue, with the minimizer in pink. The selected  $k$ -mers are highlighted using a blue star.

733

734 **Graphmap's indexing strategy for fuzzy seeds** Graphmap builds two hash indexes from  
 735 two types of shapes, called 6-1-6 and 4-1-4-1-4. As shown in Supplementary Figure S2,  
 736 for each position is seeded (no subsampling). A seeded key corresponds to the subsequence  
 737 at a given position of the reference when applying the shape mask: each *don't care* (\*)  
 738 base is skipped.

739 Then, for each read in the query, several lookup keys (for mismatch, deletion and insertion)  
 740 are built from a shape (Supplementary Figure S3). To that extent, the lookup key treats the  
 741 *don't care* base in three different ways. The mis(match) shape has the same behaviour as the  
 742 indexed key, i.e., the *don't care* base are skipped. The insertion shape skips two bases: the  
 743 initial *don't care* base and the base next to it. Finally the deletion shape will simply build  
 744 the key and keep all the base including the *don't care* base. In total, for a number  $d$  of *don't*  
 745 *care* base,  $3^d$  different keys are built per shape.

746 **Graphmap's backbone graph for LCSk** Because of the possible spurious matches that  
 747 occur because of the ambiguous bases, Graphmap's fuzzy seeds require more treatments to  
 748 find proper chains. A first step after seeding finds groups of anchors representing longer  
 749 shared subsequences between the query and the reference, on which is applied LCSk. Anchors  
 750 are placed in a vertex-centric positional graph of  $k$ -mers, in which  $k$ -mers in both sequences  
 751 appear, and share an arc if they are directly consecutive (or consecutive up to a distance  
 752 parameter)<sup>5</sup>. Most weighted paths of anchors (i.e. supported by the query and the reference)  
 753 are found in this graph and output as shared subsequences. After the LCSk pass, a L1 linear

<sup>5</sup> NB: this is different from a de Bruijn graph since nodes with similar contents can be repeated

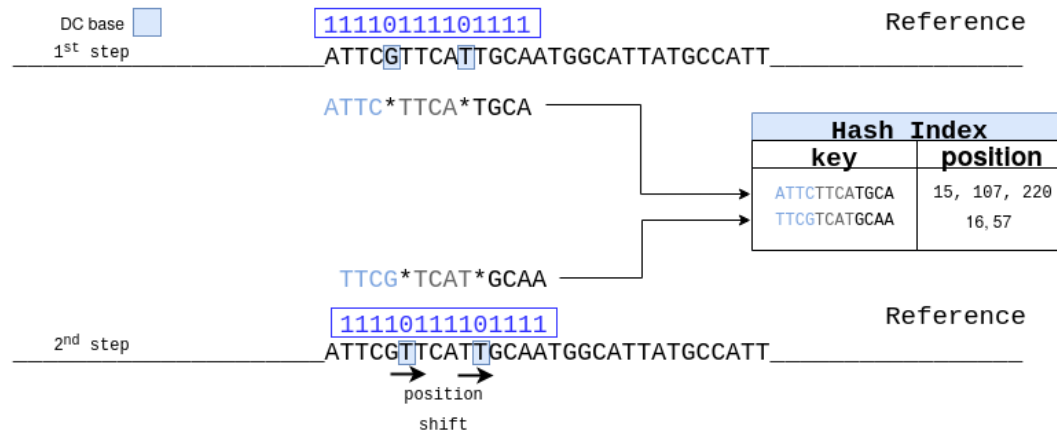

**Figure S2** Indexing scheme for fuzzy seeds allowing indels and substitutions in Graphmap. In the figure the shape 4.1.4.1.4 is represented. The zeros represent the don't care positions of the shape. The shape is then applied for each position of the genome. The substring built from the shape is used as key inside a hash index. Each key will correspond to one or more positions on the reference.

754 regression step is applied to fit a straight line with a 45 degree slope and remove outliers,  
 755 especially in the beginning and end of the chain (see case 4 in Figure 3 in the main text).  
 756 Note that other methods use graphs built over anchors as backbones to the chaining and  
 757 alignment steps without fuzzy seeds [73, 49].

#### 758 Minimap2's complete formula for regular and large gaps size

759 ■ For regular gaps size:

$$760 \quad f(i) = \max\left\{ \max_{\substack{i > j \geq 1 \\ x_i - G < x_j \leq x_i \\ y_i - G < y_j < y_i}} f(j) + \min\{d_{ji}, w\} - \gamma_r(g_{ji}, w) \right\}$$

761 The property  $x_i - G \leq x_j \leq x_i$  and  $y_i - G \leq y_j < y_i$  is equivalent to  $y_j < y_j, x_j \leq x_i$   
 762 and  $e_{ji} < G$ .

763 ■ For large gaps size:

$$764 \quad f'(i) = \max_{\substack{i > j \geq 1 \\ x_i - G < x_j \leq x_i - w \\ y_i - G \leq y_j \leq y_i - w}} f'(j) + w - \gamma_l(g_{ji}, d_{ji})$$

765 where

$$d_{ji} = \min\{y_i - y_j, x_i - x_j\}$$

Smaller "distance" between the two anchors. This is not really a distance by definition : for  $(x_i, y_i) = (-n, 0)$ ,  $(x_j, y_j) = (0, 0)$  and  $(x_k, y_k) = (0, n)$ , we have  $d_{ij} + d_{jk} = 0 < n = d_{ij}$ .

$$766 \quad e_{ji} = \max\{y_i - y_j, x_i - x_j\}$$

Discrete Chebyshev distance between the two anchors

$$g_{ji} = |(y_i - y_j) - (x_i - x_j)|$$

Gap length (or Manhattan distance between the diagonals passing by the two anchors)

$$\gamma_r(g) = 0.01 \times w \times g + 0.5 \log_2 g$$

$$\gamma_l(g, d) = c_1 \times g + c_2 \times d + \log_2 g \quad \text{where } c_1 \text{ and } c_2 \text{ are parameters}$$

## 22 A survey of long-read mapping

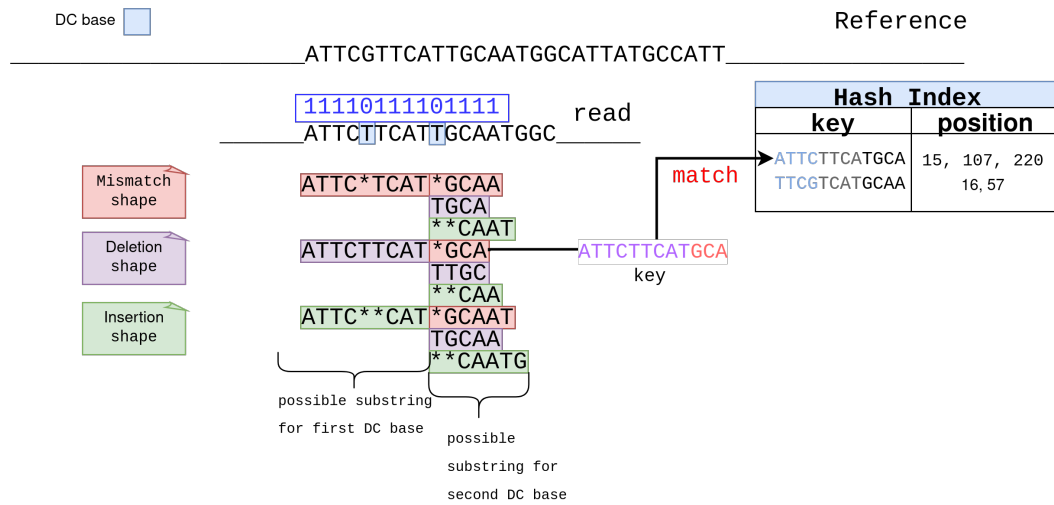

■ **Figure S3** Query in Graphmap, different possible sequences can be matched using a single key. As we can see, there are three types of look-up shapes, and each of them is used to reconstruct a different substring. Each type corresponds to three phenomena that can occur with errors in sequencing, namely substitution, substitution + 1 insertion, and substitution + 1 deletion. Here, two don't care bases are present and nine substrings can be obtained. In this example the substring obtained from the substitution + insertion shape and the mismatch leads to a match with the reference.

767 **Hough transform principle** Applying the Hough transform means going from the  $S_1 =$   
 768 (*query, reference*) space to the Hough  $S_2$  space of coordinates. If a line ( $y = ax + b$ ) exists  
 769 in  $S_1$ , it is a point of coordinates  $(a, b)$  in  $S_2$  (practically, polar coordinates are used for  
 770 technical reasons). All possible lines intersecting a point in  $S_1$  can be translated in  $S_2$  as  
 771 a sine wave. Multiple anchors give multiple points in  $S_2$ , and the intersection of possible  
 772 sinusoids intersecting the different points in  $S_2$  correspond to a line roughly intersecting  
 773 the initial anchors in  $S_1$ . The Hough space is rasterized, and by counting and weighing the  
 774 possible solutions in  $S_2$ , lines can be deduced in  $S_1$ . Contrary to linear regression which  
 775 would output the best line explained by the seed distribution in  $S_1$ , here an arbitrary number  
 776 of straight lines can be output and considered (see Supplementary Figure S4 for an overview  
 of the steps).

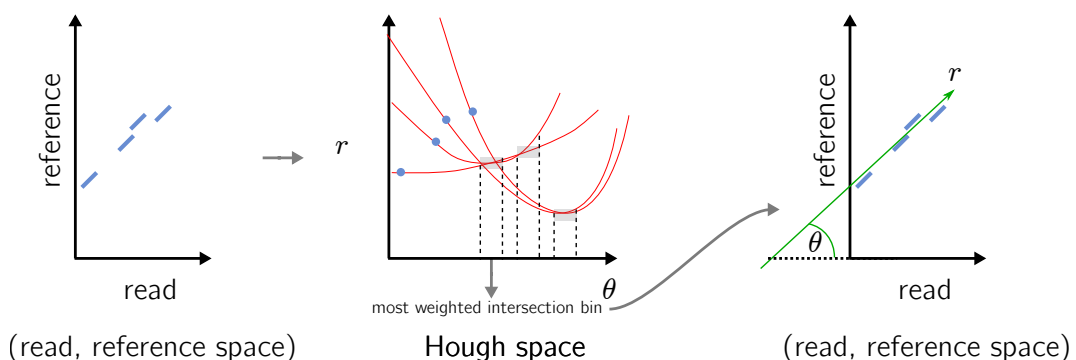

■ **Figure S4** An overview of the Hough transform steps.
